# Supplementary material for: Members of the Fibroblast Growth Factor Receptor Superfamily Are Proteolytically Cleaved by Two Differently Activated Metalloproteases
Source: PubMed Central journal article supplement (PMC8003738; doi:10.3390/ijms22063165), 2021-03-20
Supplement: ijms-22-03165-s001.pdf [file ijms-22-03165-s001.pdf]

## Figure S1

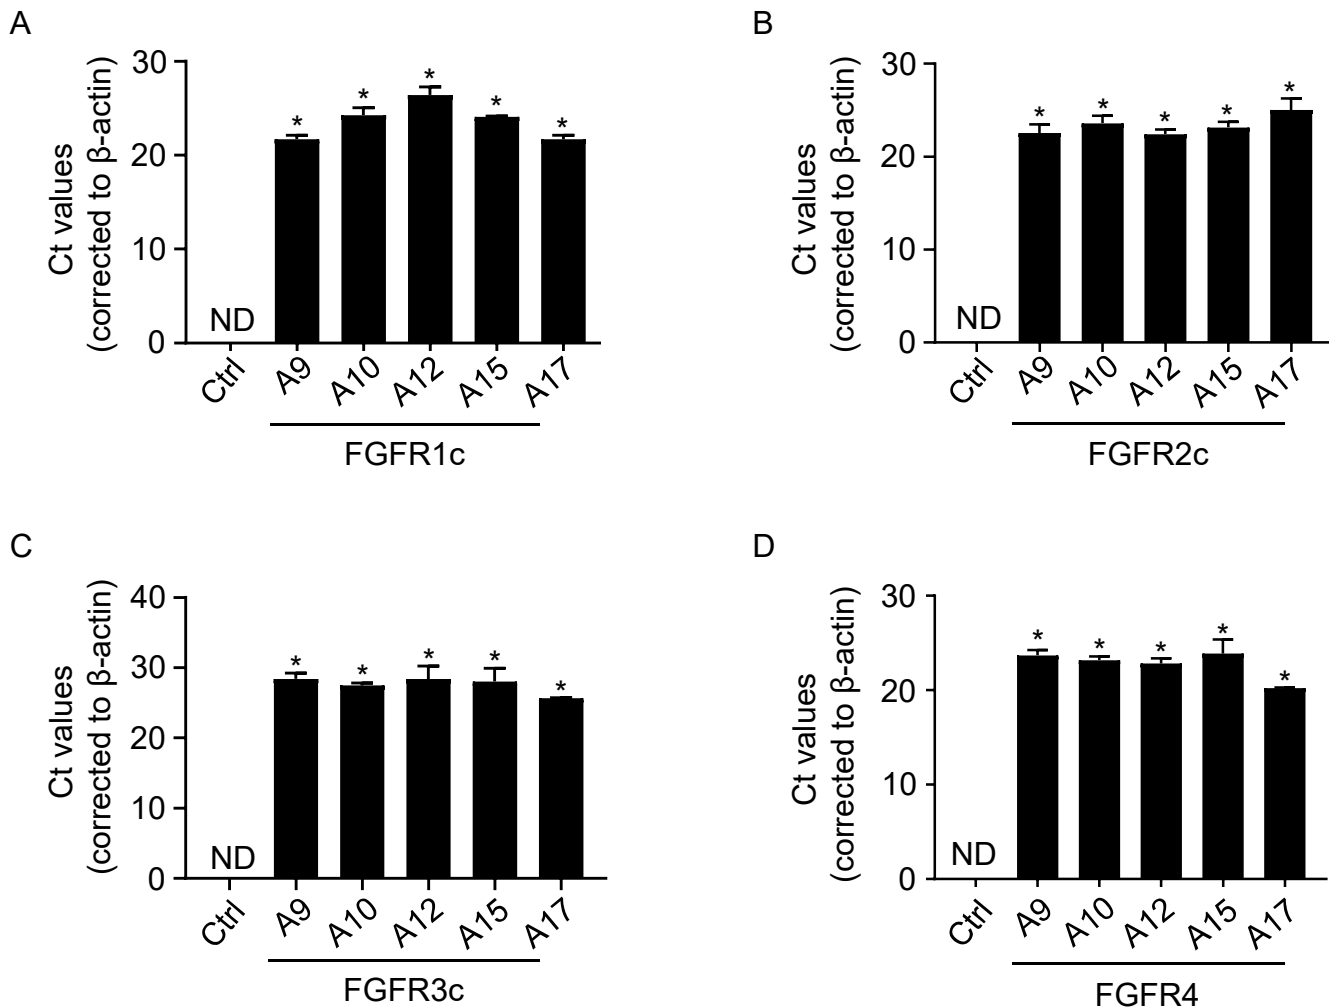

**Figure S1. Gene expression levels of five transiently overexpressed ADAMs in COS-7 cells.** Overexpression of ADAMs 9 (A9), 10 (A10), 12 (A12), 15 (A15), or 17 (A17) with FGFRs 1c (S1A), 2c (S1B), 3c (S1C) and 4 (S1D) in COS-7 cells. (\*) indicates significant increase in ADAMs 9, 10, 12, 15, or 17 mRNA expression in transfected COS-7 sample compared with untransfected sample.  $n = 3$ ; values are  $\pm$  s.e.m; Student's  $t$ -test;  $*P \leq 0.05$ .
